# Supplementary material
Source: HighWire-hosted journal article supplement (http://dmd.aspetjournals.org/highwire/filestream/66614/field_highwire_adjunct_files/0/Supplemental_67173.pdf)

DMD # 67173

**Application of Micropatterned Co-cultured Hepatocytes to  
Evaluate the Inductive Potential and Degradation Rate of  
Major Xenobiotic Metabolizing Enzymes**

Vaishali Dixit, Amanda Moore, Hong Tsao and Niresh Hariparsad

Drug Metabolism and Pharmacokinetics, Vertex Pharmaceuticals Incorporated, Boston,  
Massachusetts, USA

Drug Metabolism and Disposition

**Supplemental Table 1:** Summary of Rifampin drug related input parameters used for Simcyp modeling. \* Data Source: Simcyp compound library v13.

| <b>Parameter*</b>                          | <b>Rifampin</b> |
|--------------------------------------------|-----------------|
| Mol Weight (g/mol)                         | 823             |
| Log P                                      | 3.28            |
| pKa                                        | 7.9, 1.7        |
| $f_{u, \text{plasma}}$                     | 0.15            |
| Blood/plasma ratio (B/P)                   | 0.9             |
| $f_a$                                      | 1               |
| Absorption rate constant: $k_a$ (1/h)      | 0.51            |
| Volume of distribution: $V_{ss}$ (L/kg)    | 0.33            |
| Renal clearance: $CL_R$ (L/h)              | 1.2             |
| Systemic plasma clearance: $CL_{iv}$ (L/h) | 7               |

**Supplemental Table 2:** Comparative statistics (n=3) of the gene expression in HepatoPac model vs the monoculture model.  $\Delta$ Ct values from both models were compared using t test in GraphPad Prism. P value of less than 0.05 was considered statistically significant.

| Taqman Probe          | Metabolic enzymes | p value<br>NON | p value<br>BPB | p value<br>Hu1624 |
|-----------------------|-------------------|----------------|----------------|-------------------|
| AOX1-Hs00154079_m1    | aldehyde oxidase  | 0.04           | 0.79           |                   |
| CYP1A1-Hs00153120_m1  | CYP1A1            | 0.16           | 0.01           | 0.52              |
| CYP1A2-Hs00167927_m1  | CYP1A2            | 0.03           | 0.38           | 0.01              |
| CYP2A6-Hs00868409_s1  | CYP2A6            | 0.01           |                | 0.97              |
| CYP2B6-Hs04183483_g1  | CYP2B6            | 0.05           | 0.00           | 0.53              |
| CYP2C19-Hs00426380_m1 | CYP2C19           | 0.13           | 0.01           | 0.01              |
| CYP2C8-Hs00946140_g1  | CYP2C8            | 0.01           | 0.00           | 0.06              |
| CYP2C9-Hs02383631_s1  | CYP2C9            | 0.07           | 0.02           | 0.63              |
| CYP2D6-Hs03043788_g1  | CYP2D6            | 0.13           | 0.00           | 0.00              |
| CYP2E1-Hs00559368_m1  | CYP2E1            | 0.00           | 0.00           | 0.00              |
| CYP3A4-Hs00604506_m1  | CYP3A4            | 0.00           | 0.00           | 0.25              |
| CYP3A43-Hs01119078_mH | CYP3A43           | 0.27           |                | 0.07              |
| CYP3A5-Hs01070905_m1  | CYP3A5            | 0.17           | 0.00           | 0.81              |
| CYP3A7-Hs00426361_m1  | CYP3A7            | 0.80           | 0.00           | 0.01              |
| CYP4F12-Hs02515808_s1 | CYP4F12           | 0.03           | 0.02           | 0.06              |
| FMO1-Hs00266654_m1    | FMO1              | 0.30           | 0.03           | 0.32              |
| FMO2-Hs00155158_m1    | FMO2              | 0.16           |                |                   |
| FMO3-Hs00199368_m1    | FMO3              | 0.14           | 0.23           | 0.87              |
| FMO4-Hs00157614_m1    | FMO4              | 0.00           | 0.01           | 0.01              |
| FMO5-Hs00356233_m1    | FMO5              | 0.39           | 0.13           | 0.04              |
| FOXO1-Hs01054576_m1   | FOXO1             | 0.12           | 0.76           | 0.10              |
| GSTA2-Hs00747232_mH   | GST A2            | 0.12           | 0.41           | 0.07              |
| GSTA3-Hs02555455_sH   | GST A3            | 0.03           | 0.84           | 0.13              |
| SULT1A1-Hs00738644_m1 | SULT1A1           |                | 0.31           | 0.07              |
| SULT1A2-Hs02340929_g1 | SULT1A2           | 0.07           | 0.04           | 0.02              |
| SULT1B1-Hs00234899_m1 | SULT1B1           | 0.00           | 0.00           | 0.00              |
| SULT1E1-Hs00960941_m1 | SULT2E1           | 0.01           | 0.12           | 0.02              |
| SULT2A1-Hs00234219_m1 | SULT2A1           | 0.01           | 0.04           | 0.07              |
| UGT1A1-Hs02511055_s1  | UGT1A1            | 0.01           | 0.00           | 0.01              |
| UGT1A6-Hs01592477_m1  | UGT1A6            | 0.00           | 0.29           | 0.81              |
| UGT1A8-Hs01592482_m1  | UGT1A8            | 0.01           | 0.02           | 0.01              |
| UGT2B15-Hs00870076_s1 | UGT2B15           | 0.37           | 0.00           | 0.16              |
| UGT2B4-Hs02383831_s1  | UGT2B4            | 0.04           | 0.01           | 0.10              |
| UGT2B7-Hs00426592_m1  | UGT2B7            | 0.07           | 0.01           | 0.06              |
| CYP2J2-Hs00951113_m1  | CYP2J2            | 0.02           | 0.95           | 0.65              |
| AADAC                 | AADAC             | 0.000015       | 0.001926       | 0.000203          |
| CES                   | CES               | 0.000216       | 0.009267       | 0.000041          |

| Taqman Probe          | Transporters | p value<br>NON | p value<br>BPB | p value<br>Hu1624 |
|-----------------------|--------------|----------------|----------------|-------------------|
| ABCB1-Hs00184500_m1   | MDR1         | 0.21           | 0.01           | 0.00              |
| ABCB11-Hs00184824_m1  | BSEP         | 0.02           | 0.03           | 0.00              |
| ABCB4-Hs00240956_m1   | MDR3         | 0.02           | 0.00           | 0.11              |
| ABCC1-Hs01561502_m1   | MRP1         | 0.00           | 0.04           | 0.49              |
| ABCC2-Hs00166123_m1   | MRP2         | 0.03           | 0.99           | 0.01              |
| ABCC3-Hs00978473_m1   | MRP3         | 0.52           | 0.01           | 0.05              |
| ABCC4-Hs00988717_m1   | MRP4         | 0.76           | 0.10           | 0.09              |
| ABCC6-Hs00184566_m1   | MRP6         | 1.00           | 0.68           | 0.00              |
| ABCG2-Hs01053790_m1   | BCRP         | 0.99           | 0.01           | 0.01              |
| SLC10A1-Hs00161820_m1 | NTCP         | 0.19           | 0.05           | 0.10              |
| SLC22A1-Hs00427552_m1 | OCT1         | 0.03           | 0.01           | 0.65              |
| SLC22A7-Hs00198527_m1 | OAT2         | 0.73           | 0.00           | 0.09              |
| SLCO1B1-Hs00272374_m1 | OATP1B1      | 0.04           | 0.16           | 0.57              |
| SLCO1B3-Hs00251986_m1 | OATP1B3      | 0.00           | 0.00           | 0.01              |
| SLCO2B1-Hs01030343_m1 | OATP2B1      | 0.00           | 0.00           | 0.02              |
| SLC47A1-Hs00217320_m1 | MATE1        | 0.84           | 0.03           | 0.03              |
| SLC29A1-Hs01085704_g1 | ENT1         | 0.01           | 0.00           | 0.00              |
| SLC29A2-Hs00155426_m1 | ENT2         | 0.75           | 0.00           | 0.04              |

| Taqman Probe           | Nuclear receptors              | p value<br>NON | p value<br>BPB | p value<br>Hu1624 |
|------------------------|--------------------------------|----------------|----------------|-------------------|
| AHR-Hs00169233_m1      | AhR                            | 0.13           | 0.67           | 0.67              |
| HNF1A-Hs00167041_m1    | HNF 1 alpha                    | 0.08           | 0.14           | 0.69              |
| HNF4A-Hs00230853_m1    | HNF 4 alpha                    | 0.96           | 0.02           | 0.12              |
| NCOA1-Hs00186661_m1    | nuclear receptor coactivator 1 | 0.02           | 0.18           | 0.86              |
| NCOA2-Hs00896106_m1    | nuclear receptor coactivator 2 | 0.23           | 0.01           | 0.92              |
| NCOA3-Hs01105251_m1    | nuclear receptor coactivator 3 | 0.11           | 0.00           | 0.78              |
| NCOR1-Hs01094540_m1    | nuclear receptor corepressor 1 | 0.00           | 0.00           | 0.00              |
| NCOR2-Hs00196955_m1    | nuclear receptor corepressor 2 | 0.07           | 0.00           | 0.30              |
| NR0B2-Hs00222677_m1    | SHP1                           | 0.02           | 0.08           | 0.06              |
| NR1H2-Hs01027208_m1    | LXR                            | 0.76           | 0.03           | 0.35              |
| NR1H4-Hs01026590_m1    | FXR                            | 0.08           | 0.50           | 0.26              |
| NR1I2-Hs01114267_m1    | PXR                            | 0.04           | 0.13           | 0.02              |
| NR1I3-Hs00901571_m1    | CAR1                           | 0.03           | 0.01           | 0.57              |
| NR3C1-Hs00353740_m1    | glucocorticoid receptor        | 0.00           | 0.37           | 0.84              |
| PPARGC1A-Hs01016719_m1 | PPARg                          | 0.53           | 0.02           | 0.01              |
| RXRA-Hs01067640_m1     | RXRa                           | 0.14           | 0.12           | 0.34              |
| VDR-Hs00172113_m1      | VDR                            | 0.92           | 0.45           | 0.35              |

**FIGURE LEGENDS:**

**Supplemental Figure 1:** cDNA from vehicle treated cells from both monocultures and HepatoPac cultures of hepatocytes were used to determine the basal expression of transcription factors, as well as co-activator and co-repressor genes. Gene expression in HepatoPac cultures were compared with monocultured hepatocytes and the data were expressed as relative change over monocultured cells in 3 lots of hepatocytes. Data are shown as mean (SD) of 3 determinations.

Supplemental Data Figure 1

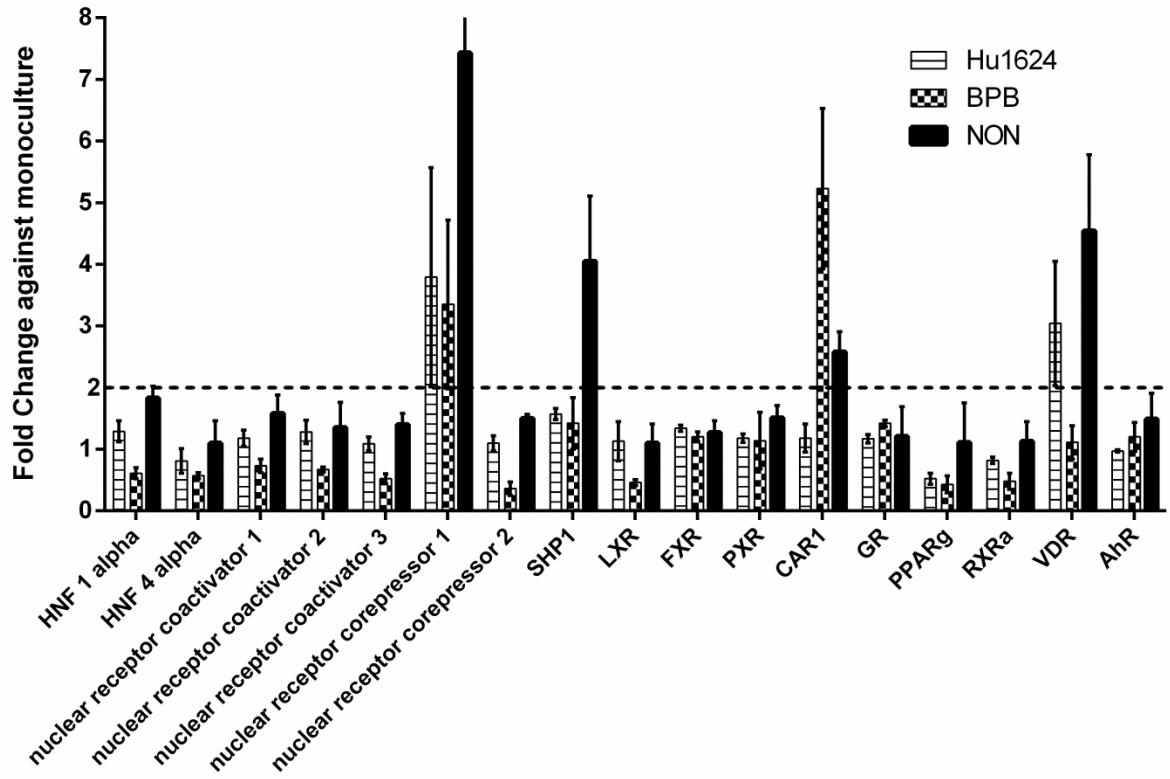

Supplement: Supplemental_67173.pdf [file Supplemental_67173.pdf]
